# Supplementary material for: Plastid phylogenomics and morphological character evolution of Chloridoideae (Poaceae)
Source: Front Plant Sci. 2022 Nov 2;13:1002724. doi: 10.3389/fpls.2022.1002724 (PMC9666777; doi:10.3389/fpls.2022.1002724)
Supplement: Supplementary file 8 [file Table_1.xlsx]

## Sheet: Table S1
Table S1. Genebank accession numbers of downloaded data from NCBI
Taxa	Genebank accession number
Aeluropus lagopoides	NC_042858
Astrebla lappacea	NC_042839
Astrebla pectinata	NC_029891
Bouteloua curtipendula	NC_029414
Bouteloua gracilis	NC_029892
Centropodia glauca	NC_029411
Chionochloa macra	NC_025230
Chloris barbata	NC_029893
Chloris truncata	NC_032033
Chloris virgata	NC_032034
Cortaderia selloana	NC_036681
Cynodon dactylon	NC_034680
Dactyloctenium aegyptium	NC_036714
Dactyloctenium radulans	NC_042838
Danthonia californica	NC_025232
Distichlis bajaensis	NC_029894
Distichlis spicata	NC_029895
Eleusine indica	NC_030486
Enneapogon caerulescens	NC_042837
Enneapogon oblongus	NC_036682
Enteropogon ramosus	NC_042834
Eragrostis minor	NC_029412
Eragrostis setifolia	NC_042832
Eragrostis tef	NC_029413
Eragrostis tenellula	NC_042833
Eustachys glauca	NC_036685
Halopyrum mucronatum	NC_036688
Hilaria cenchroides	NC_029415
Hilaria rigida	NC_029896
Leptochloa pluriflora	NC_037169
Leptochloa virgata	NC_036692
Melanocenchris abyssinica	NC_036694
Nematopoa longipes	NC_035532
Neyraudia reynaudiana	NC_024262
Orinus kokonorica	NC_042859
Oropetium aristatum	NC_036697
Oxychloris scariosa	NC_037158
Spartina maritima	NC_027650
Sporobolus helvolus	NC_042237
Sporobolus heterolepis	NC_029417
Sporobolus michauxianus	NC_029416
Tragus australianus	NC_042830
Trichoneura grandiglumis	NC_036707
Triodia basedowii	NC_042860
Triodia chichesterensis	NC_042861
Triodia concinna	NC_042862
Triodia glabra	NC_042863
Triodia lanigera	NC_042872
Triodia longiceps	NC_042864
Triodia mallota	NC_042865
Triodia plurinervata	NC_042866
Triodia rigidissima	NC_042867
Triodia schinzii	NC_042870
Triodia scintillans	NC_042871
Triodia stipoides	NC_037157
Triodia tomentosa	NC_042868
Triodia vanleeuwenii	NC_042869
Triodia wiseana	NC_037161
Tripogonella loliiformis	NC_042840
Triraphis mollis	NC_042835
Uniola paniculata	NC_036709
Urochondra setulosa	NC_042238
Vaseyochloa multinervosa	NC_036710
Zoysia japonica	NC_036827
Zoysia macrantha	NC_029418
Zoysia macrostachya	NC_042189
Zoysia matrella	AP014937
Zoysia sinica	NC_042187
Zoysia tenuifolia	NC_042188
