# Supplementary material for: Plastid phylogenomics and morphological character evolution of Chloridoideae (Poaceae)
Source: Front Plant Sci. 2022 Nov 2;13:1002724. doi: 10.3389/fpls.2022.1002724 (PMC9666777; doi:10.3389/fpls.2022.1002724)
Supplement: Supplementary file 9 [file Table_2.xlsx]

## Sheet: Table S2
Table S2. Estimated divergence time for Chloridoideae
	PL point (Ma)	PL min (Ma)	PL max (Ma)
MRCA of Chloridoideae	43	42.87	43
MRCA of Cynodonteae, Zoysieae, Eragrostideae and Triraphideae	35.24	34.83	37.05
MRCA of Cynodonteae, Zoysieae and Eragrostideae	33.29	32.76	35.29
MRCA of Cynodonteae and Zoysieae	29.98	29.49	32.28
crown of Cynodonteae	25.92	25.45	28.79
MRCA of Cleistogenes, Orinus and Triodia	20.8	20.31	27.58
MRCA of Eleusininae and Aeluropodinae	21.66	20.77	27.67
crown of Eleusininae	17.83	17.35	23.7
crown of Triraphideae	8.59	8.17	17.13
crown of Eragrostideae	22.98	22.49	26.07
crown of Zoysieae	18.54	17.79	21.36
crown of Cynodonteae	25.91	25.45	28.79
Penalized likelihood (PL) point represents the point age estimation in the maximum likelihood best tree.
PL min and PL max represent the minimum and maximum estimations by 1,000 maximum likelihood
bootstrap trees. Ma: million years ago. MRCA: most recent common ancestor.
