# Supplementary material for: Plastid phylogenomics and morphological character evolution of Chloridoideae (Poaceae)
Source: Front Plant Sci. 2022 Nov 2;13:1002724. doi: 10.3389/fpls.2022.1002724 (PMC9666777; doi:10.3389/fpls.2022.1002724)
Supplement: Supplementary file 10 [file Table_3.xlsx]

## Sheet: Table S3
Table S3. The list of 51 taxa used in ancestral state reconstruction of Chloridoideae
Acrachne racemosa
Aeluropus sinensis
Bouteloua dactyloides
Centropodia glauca
Chloris barbata
Chloris virgata
Cleistogenes sp. nov.
Cleistogenes caespitosa var. caespitosa
Cleistogenes caespitosa var. ramosa
Cleistogenes chinensis
Cleistogenes festucacea
Cleistogenes gracilis
Cleistogenes hackelii var. hackelii
Cleistogenes hancei
Cleistogenes polyphylla
Cleistogenes songorica
Cleistogenes squarrosa
Cleistogenes hackelii var. nakaii
Crypsis aculeata
Cynodon dactylon
Cynodon radiatus
Dactyloctenium aegyptium
Desmostachya bipinnata
Dinebra retroflexa
Diplachne fusca
Eleusine coracana
Eleusine indica
Enneapogon desvauxii
Enteropogon dolichostachyus
Eragrostis minor
Eragrostis pilosa
Eragrostis cilianensis
Harpachne harpachnoides
Leptochloa chinensis
Leptochloa panicea
Lepturus repens
Microchloa indica
Muhlenbergia huegelii
Muhlenbergia japonica
Orinus kokonorica
Orinus thoroldii
Perotis hordeiformis
Perotis indica
Perotis rara
Sporobolus diander
Sporobolus fertilis
Sporobolus virginicus
Tragus berteronianus
Tripogon chinensis
Zoysia matrella
Zoysia sinica
