# Supplementary material for: Plastid phylogenomics and morphological character evolution of Chloridoideae (Poaceae)
Source: Front Plant Sci. 2022 Nov 2;13:1002724. doi: 10.3389/fpls.2022.1002724 (PMC9666777; doi:10.3389/fpls.2022.1002724)
Supplement: Supplementary file 11 [file Table_4.xlsx]

## Sheet: Sheet1
Table S4. Summary of major features of 108 Chloridoideae plastomes used in this study
	Plastome length(bp)	LSC length(bp)	IR length(bp)	SSC length(bp)	Total genes	Total CDS	Total tRNA	Total rRNA	GC content(%)	Unique genes	Unique CDS
Centropodia glauca	134565	80074	21012	12467	130	84	38	8	38.4	111	77
Neyraudia reynaudiana	135367	80616	21031	12689	130	84	38	8	38.4	111	77
Triraphis mollis	134579	79883	21028	12640	130	84	38	8	38.4	111	77
Nematopoa longipes	134459	79882	21019	12539	132	86	38	8	38.3	112	78
Enneapogon desvauxii	131516	77993	20506	12511	132	86	38	8	38.3	112	78
Enneapogon caerulescens	133231	78883	20969	12410	132	86	38	8	38.3	112	78
Enneapogon oblongus	133433	78839	21024	12546	132	86	38	8	38.3	112	78
Eragrostis minor	135023	80316	21065	12577	130	84	38	8	38.2	111	77
Eragrostis setifolia	134928	80416	21009	12494	130	84	38	8	38.3	111	77
Eragrostis tef	134435	79802	21026	12581	130	84	38	8	38.3	111	77
Eragrostis tenellula	130773	79387	19394	12598	128	82	38	8	38.4	110	76
Harpachne harpachnoides	133830	79083	21069	12609	130	84	38	8	38.3	111	77
Uniola paniculata	135322	80643	21042	12595	130	84	38	8	38.3	111	77
Sporobolus diander	135381	80880	20964	12573	132	86	38	8	38.2	112	78
Sporobolus fertilis	135025	80530	20958	12579	132	86	38	8	38.2	112	78
Sporobolus helvolus	135410	80717	21008	12677	132	86	38	8	38.4	112	78
Sporobolus heterolepis	135097	81213	20571	12742	130	84	38	8	38.4	111	77
Sporobolus michauxianus	135617	80922	20985	12725	130	84	38	8	38.4	111	77
Sporobolus virginicus	135871	81171	20994	12712	130	84	38	8	38.3	111	77
Crypsis aculeata	134822	80055	21031	12705	132	86	38	8	38.3	112	78
Spartina maritima	135592	80858	21010	12714	130	84	38	8	38.5	111	77
Urochondra setulosa	135134	80628	20950	12606	132	86	38	8	38.5	112	78
Zoysia japonica	135854	81348	20962	12582	130	84	38	8	38.4	111	77
Zoysia macrantha	135845	81351	20961	12572	130	84	38	8	38.4	111	77
Zoysia macrostachya	135904	81392	20963	12586	130	84	38	8	38.4	111	77
Zoysia matrella	135810	81307	20960	12583	130	84	38	8	38.4	111	77
Zoysia sinica	135872	81366	20962	12582	130	84	38	8	38.4	111	77
Zoysia tenuifolia	135892	81376	20966	12584	130	84	38	8	38.4	111	77
Aeluropus lagopoides	135518	80813	21010	12685	130	84	38	8	38.2	111	77
Aeluropus sinensis	135563	80855	21010	12688	130	84	38	8	38.3	111	77
Acrachne racemosa	135616	80921	21024	12647	130	84	38	8	38.4	111	77
Dactyloctenium aegyptium	134889	80549	21019	12302	130	84	38	8	38.4	111	77
Dactyloctenium radulans	135050	80495	21010	12535	130	84	38	8	38.4	111	77
Astrebla lappacea	135801	81110	21020	12651	130	84	38	8	38.3	111	77
Astrebla pectinata	135737	81045	21020	12652	130	84	38	8	38.3	111	77
Chloris barbata	135372	80819	21015	12523	130	84	38	8	38.3	111	77
Chloris truncata	135584	81025	21017	12525	130	84	38	8	38.3	111	77
Chloris virgata	134561	80011	21016	12518	130	84	38	8	38.3	111	77
Cynodon dactylon	134297	79732	21022	12521	130	84	38	8	38.4	111	77
Cynodon radiatus	134055	79491	21015	12534	130	84	38	8	38.4	111	77
Dinebra retroflexa	135793	81098	21013	12669	130	84	38	8	38.3	111	77
Eleusine coracana	135144	80666	20919	12640	130	84	38	8	38.2	111	77
Eleusine indica	135151	80667	20919	12646	130	84	38	8	38.2	111	77
Enteropogon dolichostachyus	135541	80980	21022	12517	130	84	38	8	38.3	111	77
Enteropogon ramosus	132690	80092	20007	12584	130	84	38	8	38.3	111	77
Eustachys glauca	135053	80421	21013	12606	130	84	38	8	38.3	111	77
Leptochloa chinensis	135656	80844	21025	12762	130	84	38	8	38.3	111	77
Leptochloa panicea	135701	81039	21013	12636	130	84	38	8	38.3	111	77
Leptochloa pluriflora	134507	80291	20788	12640	130	84	38	8	38.4	111	77
Leptochloa virgata	134500	80282	20790	12638	130	84	38	8	38.4	111	77
Diplachne fusca	135282	80739	20961	12621	130	84	38	8	38.3	111	77
Lepturus repens	135736	81075	21026	12609	130	84	38	8	38.3	111	77
Microchloa indica	134467	79904	20989	12585	132	86	38	8	38.2	112	78
Oxychloris scariosa	134963	80364	21004	12591	130	84	38	8	38.4	111	77
Cleistogenes caespitosa var. caespitosa	134654	80430	20780	12664	130	84	38	8	38.4	111	77
Cleistogenes festucacea	134594	80375	20780	12659	130	84	38	8	38.4	111	77
Cleistogenes gracilis	134576	80357	20780	12659	130	84	38	8	38.4	111	77
Cleistogenes hackelii var. nakaii	134531	80318	20780	12653	130	84	38	8	38.4	111	77
Cleistogenes hackelii var. hackelii	134588	80369	20780	12659	130	84	38	8	38.4	111	77
Cleistogenes hancei	134549	80329	20781	12658	130	84	38	8	38.4	111	77
Cleistogenes polyphylla	134579	80360	20780	12659	130	84	38	8	38.4	111	77
Cleistogenes songorica	134556	80348	20780	12648	130	84	38	8	38.4	111	77
Cleistogenes squarrosa	134509	80296	20782	12649	130	84	38	8	38.4	111	77
Cleistogenes sp. nov.	134497	80266	20780	12671	130	84	38	8	38.4	111	77
Cleistogenes caespitosa var. ramosa	134233	80003	20780	12670	130	84	38	8	38.4	111	77
Cleistogenes chinensis	134550	80337	20780	12653	130	84	38	8	38.4	111	77
Orinus kokonorica	133953	80650	20327	12649	130	84	38	8	38.2	111	77
Orinus thoroldii	134218	80946	20327	12618	130	84	38	8	38.2	111	77
Triodia basedowii	135278	80563	21037	12641	130	84	38	8	38.4	111	77
Triodia chichesterensis	135284	80625	21012	12635	130	84	38	8	38.4	111	77
Triodia concinna	135218	80562	21009	12638	130	84	38	8	38.5	111	77
Triodia glabra	135251	80576	21019	12637	130	84	38	8	38.4	111	77
Triodia lanigera	135453	80774	21019	12641	130	84	38	8	38.4	111	77
Triodia longiceps	134425	80341	20708	12668	130	84	38	8	38.4	111	77
Triodia mallota	135261	80575	21024	12638	130	84	38	8	38.4	111	77
Triodia plurinervata	135386	80880	21027	12452	130	84	38	8	38.5	111	77
Triodia rigidissima	135657	80989	21023	12622	130	84	38	8	38.4	111	77
Triodia schinzii	135016	80950	20712	12642	130	84	38	8	38.3	111	77
Triodia scintillans	135301	80592	21037	12635	130	84	38	8	38.4	111	77
Triodia stipoides	134874	80169	21047	12611	130	84	38	8	38.4	111	77
Triodia tomentosa	135375	80703	21024	12624	130	84	38	8	38.5	111	77
Triodia vanleeuwenii	135318	80656	21013	12636	130	84	38	8	38.4	111	77
Triodia wiseana	134962	80898	20711	12642	130	84	38	8	38.4	111	77
Desmostachya bipinnata	135796	81109	21012	12663	130	84	38	8	38.4	111	77
Halopyrum mucronatum	135815	81126	21020	12649	130	84	38	8	38.4	111	77
Melanocenchris abyssinica	134878	80273	21025	12555	130	84	38	8	38.3	111	77
Oropetium aristatum	133880	79176	21060	12584	130	84	38	8	38.5	111	77
Tripogon bromoides	133744	79120	21013	12598	130	84	38	8	38.5	111	77
Tripogon chinensis	133744	79121	21013	12597	130	84	38	8	38.5	111	77
Tripogonella loliiformis	133837	79697	20754	12632	130	84	38	8	38.5	111	77
Bouteloua dactyloides	134256	79696	21038	12484	130	84	38	8	38.1	111	77
Bouteloua curtipendula	133865	79309	20975	12606	130	84	38	8	38.2	111	77
Bouteloua gracilis	133742	79307	21027	12381	130	84	38	8	38.2	111	77
Hilaria cenchroides	134824	80238	21085	12416	130	84	38	8	38.3	111	77
Hilaria rigida	135318	80576	21074	12594	130	84	38	8	38.3	111	77
Distichlis bajaensis	135452	83456	19628	12740	130	84	38	8	38.2	111	77
Distichlis spicata	138504	83375	21225	12679	131	84	39	8	38.2	111	77
Muhlenbergia huegelii	134311	79831	20922	12636	132	86	38	8	38.1	112	78
Muhlenbergia japonica	134255	79756	20947	12605	132	86	38	8	38.2	112	78
Muhlenbergia ramosa	134265	79768	20947	12603	132	86	38	8	38.2	112	78
Tragus berteronianus	134866	80353	21032	12449	130	84	38	8	38.3	111	77
Tragus mongolorum	134934	80423	21031	12449	130	84	38	8	38.3	111	77
Tragus australianus	134935	80369	21057	12452	130	84	38	8	38.3	111	77
Vaseyochloa multinervosa	134891	80254	21044	12549	130	84	38	8	38.5	111	77
Perotis indica	134184	79656	21000	12528	132	86	38	8	38.2	112	78
Perotis rara	134265	79675	20998	12594	130	84	38	8	38.2	111	77
Perotis hordeiformis	134365	79779	20992	12602	132	86	38	8	38.2	112	78
Trichoneura grandiglumis	134286	79771	21014	12487	132	86	38	8	38.2	112	78
